# Supplementary material for: A comprehensive investigation to oxidative stress balance in human stomach adenocarcinoma
Source: Research Square preprint supplement (doi:10.21203/rs.3.rs-8156050/v1), 2026-01-12
Supplement: Supplementary file 1 [file 03217bb1958f3c393ff07f85.xlsx]

## Sheet: Pro-oxidative gene set
Gene_Symbol	Gene_full names	Search List (Metascape re-annotation)	Gene ID	Type	Tax ID	Homologene Gene ID	Homologene Gene Tax ID	Gene Symbol	Description	Biological Process (GO)	Kinase Class (UniProt)	Protein Function (Protein Atlas)	Subcellular Location (Protein Atlas)	Drug (DrugBank)	Canonical Pathways_x000D_	Hallmark Gene Sets_x000D_	GO:0034976 response to endoplasmic reticu	GO:0006979 response to oxidative stress	GO:0010498 proteasomal protein catabolic	GO:0006984 ER-nucleus signaling pathway	GO:0080135 regulation of cellular respons	GO:1905897 regulation of response to endo	GO:1903050 regulation of proteolysis invo	R-HSA-8953897 Cellular responses to stimuli	CORUM:6523 Ubiquilin-VCP-erasin complex	GO:0009411 response to UV	GO:0051098 regulation of binding	WP5124 Alzheimer's disease	GO:0032469 endoplasmic reticulum calcium	GO:1901214 regulation of neuron death	M105 PID TELOMERASE PATHWAY	GO:1900407 regulation of cellular respons	WP2355 Corticotropin-releasing hormon	GO:0001934 positive regulation of protein	GO:0045664 regulation of neuron different	hsa05165 Human papillomavirus infection
MAPK1	mitogen-activated protein kinase 1 (MAPK1)	MAPK1	5594	symbol	H. sapiens	5594	H. sapiens	MAPK1	mitogen-activated protein kinase 1	GO:0019858 cytosine metabolic process;GO:0090170 regulation of Golgi inheritance;GO:0072584 caveolin-mediated endocytosis	CMGC Ser/Thr protein kinase family	Human disease related genes:Congenital malformations:Other congenital malformations; RAS pathway related proteins; Predicted intracellular proteins; Kinases:CMGC Ser/Thr protein kinases; ENZYME proteins:Transferases; Cancer-related genes:Candidate cancer biomarkers; Enzymes; FDA approved drug targets:Small molecule drugs	Cytosol (Supported); Additional: Nuclear speckles	Acetylsalicylic acid; Minocycline; Isoprenaline; Arsenic trioxide; Olomoucine; Phosphonothreonine; Purvalanol; SB220025; Seliciclib; Perifosine; N,N-DIMETHYL-4-(4-PHENYL-1H-PYRAZOL-3-YL)-1H-PYRROLE-2-CARBOXAMIDE; N-BENZYL-4-[4-(3-CHLOROPHENYL)-1H-PYRAZOL-3-YL]-1H-PYRROLE-2-CARBOXAMIDE; (S)-N-(1-(3-CHLORO-4-FLUOROPHENYL)-2-HYDROXYETHYL)-4-(4-(3-CHLOROPHENYL)-1H-PYRAZOL-3-YL)-1H-PYRROLE-2-CARBOXAMI…	(M64)PID S1P S1P4 PATHWAY; (M134)PID TCR RAS PATHWAY; (M120)PID ARF6 DOWNSTREAM PATHWAY	(M5910)HALLMARK PROTEIN SECRETION; (M5923)HALLMARK PI3K AKT MTOR SIGNALING	0	1	0	0	1	0	1	1	0	1	1	1	1	1	1	0	1	1	0	1
ZNF277	zinc finger protein 277 (ZNF277)	ZNF277	11179	symbol	H. sapiens	11179	H. sapiens	ZNF277	zinc finger protein 277	GO:2000772 regulation of cellular senescence;GO:0070301 cellular response to hydrogen peroxide;GO:0042542 response to hydrogen peroxide		Transcription factors:Zinc-coordinating DNA-binding domains; Predicted intracellular proteins	Nucleoplasm (Approved); Additional: Plasma membrane			(M5953)HALLMARK KRAS SIGNALING UP	0	1	0	0	0	0	0	0	0	0	0	0	0	0	0	0	0	0	0	0
GSK3A	glycogen synthase kinase 3 alpha (GSK3A)	GSK3A	2931	symbol	H. sapiens	2931	H. sapiens	GSK3A	glycogen synthase kinase 3 alpha	GO:0010904 regulation of UDP-glucose catabolic process;GO:0010905 negative regulation of UDP-glucose catabolic process;GO:0071879 positive regulation of adenylate cyclase-activating adrenergic receptor signaling pathway	CMGC Ser/Thr protein kinase family	Kinases:CMGC Ser/Thr protein kinases; Enzymes; ENZYME proteins:Transferases; Predicted intracellular proteins; Cancer-related genes:Candidate cancer biomarkers	Cytosol (Approved)	Fostamatinib	(M31)PID BETA CATENIN DEG PATHWAY; (M90)PID WNT CANONICAL PATHWAY; (M1718)SIG IL4RECEPTOR IN B LYPHOCYTES		0	0	1	0	0	1	1	1	1	1	1	1	0	0	1	0	1	0	0	0
DERL1	derlin 1 (DERL1)	DERL1	79139	symbol	H. sapiens	79139	H. sapiens	DERL1	derlin 1	GO:0071712 ER-associated misfolded protein catabolic process;GO:0030970 retrograde protein transport, ER to cytosol;GO:1903513 endoplasmic reticulum to cytosol transport		Transporters:Primary Active Transporters	Endoplasmic reticulum (Supported)				1	0	1	0	0	0	0	0	1	0	1	1	0	0	0	0	0	0	0	1
MTF1	metal regulatory transcription factor 1 (MTF1)	MTF1	4520	symbol	H. sapiens	4520	H. sapiens	MTF1	metal regulatory transcription factor 1	GO:1990079 cartilage homeostasis;GO:0071294 cellular response to zinc ion;GO:0010043 response to zinc ion		Transcription factors:Zinc-coordinating DNA-binding domains; Predicted intracellular proteins	Nucleoplasm (Supported)	Silver			0	1	0	0	0	0	0	1	0	0	0	1	0	0	0	0	0	0	0	0
GSK3B	glycogen synthase kinase 3 beta (GSK3B)	GSK3B	2932	symbol	H. sapiens	2932	H. sapiens	GSK3B	glycogen synthase kinase 3 beta	GO:0150101 regulation of microtubule anchoring at centrosome;GO:2000077 negative regulation of type B pancreatic cell development;GO:0071109 superior temporal gyrus development	CMGC Ser/Thr protein kinase family	ENZYME proteins:Transferases; Predicted intracellular proteins; Enzymes; Kinases:CMGC Ser/Thr protein kinases	Nucleoplasm (Supported)	Lithium cation; 3-[3-(2,3-Dihydroxy-Propylamino)-Phenyl]-4-(5-Fluoro-1-Methyl-1h-Indol-3-Yl)-Pyrrole-2,5-Dione; SB-409513; AR-AO-14418; Staurosporine; Indirubin-3'-monoxime; 6-bromoindirubin-3'-oxime; Alsterpaullone; Phosphoaminophosphonic Acid-Adenylate Ester; 2-(1,3-benzodioxol-5-yl)-5-[(3-fluoro-4-methoxybenzyl)sulfanyl]-1,3,4-oxadiazole; 5-[1-(4-methoxyphenyl)-1H-benzimidazol-6-yl]-1,3,4-oxad…	(M31)PID BETA CATENIN DEG PATHWAY; (M90)PID WNT CANONICAL PATHWAY; (M139)PID MYC PATHWAY	(M5923)HALLMARK PI3K AKT MTOR SIGNALING; (M5924)HALLMARK MTORC1 SIGNALING	1	0	1	1	1	0	1	1	1	1	1	1	1	1	1	1	1	0	1	1
CHUK	conserved helix-loop-helix ubiquitous kinase (CHUK)	CHUK	1147	symbol	H. sapiens	1147	H. sapiens	CHUK	component of inhibitor of nuclear factor kappa B kinase complex	GO:0007252 I-kappaB phosphorylation;GO:0032727 positive regulation of interferon-alpha production;GO:0032647 regulation of interferon-alpha production	Other	Human disease related genes:Congenital malformations:Other congenital malformations; RAS pathway related proteins; Predicted intracellular proteins; ENZYME proteins:Transferases; Kinases; Disease related genes; Potential drug targets; Enzymes	Nucleoplasm (Supported); Additional: Cytosol	Aminosalicylic acid; Mesalazine; Sulfasalazine; Acetylcysteine	(M37)PID NFKAPPAB CANONICAL PATHWAY; (M264)PID TOLL ENDOGENOUS PATHWAY; (M79)PID TRAIL PATHWAY	(M5905)HALLMARK ADIPOGENESIS	0	1	0	0	0	0	1	0	0	1	1	1	0	0	0	0	0	0	0	1
TMEM33	transmembrane protein 33 (TMEM33)	TMEM33	55161	symbol	H. sapiens	55161	H. sapiens	TMEM33	transmembrane protein 33	GO:1903899 positive regulation of PERK-mediated unfolded protein response;GO:1903371 regulation of endoplasmic reticulum tubular network organization;GO:1903896 positive regulation of IRE1-mediated unfolded protein response		Transporters:Accessory Factors Involved in Transport					1	0	0	0	1	1	0	0	0	0	0	0	0	0	0	0	0	0	0	0
GOSR2	golgi SNAP receptor complex member 2 (GOSR2)	GOSR2	9570	symbol	H. sapiens	9570	H. sapiens	GOSR2	golgi SNAP receptor complex member 2	GO:0006891 intra-Golgi vesicle-mediated transport;GO:0006906 vesicle fusion;GO:0090174 organelle membrane fusion		Disease related genes; Predicted intracellular proteins; Human disease related genes:Nervous system diseases:Epilepsy	Golgi apparatus;Nucleoplasm (Supported)		(M243)PID ARF 3PATHWAY	(M5910)HALLMARK PROTEIN SECRETION; (M5922)HALLMARK UNFOLDED PROTEIN RESPONSE	1	0	0	0	0	0	0	1	0	0	0	0	0	0	0	0	0	0	0	0
REST	RE1 silencing transcription factor (REST)	REST	5978	symbol	H. sapiens	5978	H. sapiens	REST	RE1 silencing transcription factor	GO:2000706 negative regulation of dense core granule biogenesis;GO:2000797 regulation of amniotic stem cell differentiation;GO:2000798 negative regulation of amniotic stem cell differentiation		Human disease related genes:Nervous system diseases:Ear disease; Disease related genes; Transcription factors:Zinc-coordinating DNA-binding domains; Human disease related genes:Digestive system diseases:Mouth and dental diseases; Predicted intracellular proteins	Cytosol;Nucleoplasm (Supported)				0	0	0	0	1	0	1	0	0	1	1	0	0	1	1	1	1	0	1	0
ERCC6	ERCC excision repair 6, chromatin remodeling factor (ERCC6)	ERCC6	2074	symbol	H. sapiens	2074	H. sapiens	ERCC6	ERCC excision repair 6, chromatin remodeling factor	GO:0006362 transcription elongation from RNA polymerase I promoter;GO:0097680 double-strand break repair via classical nonhomologous end joining;GO:0042262 DNA protection		Human disease related genes:Nervous system diseases:Neurodegenerative diseases; Human disease related genes:Congenital malformations:Other congenital malformations; Predicted intracellular proteins; Human disease related genes:Reproductive system diseases:Reproductive system diseases; Human disease related genes:Nervous system diseases:Eye disease; Disease related genes; Human disease related gen…	Nucleoplasm (Approved); Additional: Nuclear bodies				0	1	0	0	1	0	0	0	0	1	1	0	0	0	1	0	0	1	0	0
ERP44	endoplasmic reticulum protein 44 (ERP44)	ERP44	23071	symbol	H. sapiens	23071	H. sapiens	ERP44	endoplasmic reticulum protein 44	GO:0045454 cell redox homeostasis;GO:0006986 response to unfolded protein;GO:0035966 response to topologically incorrect protein		Predicted intracellular proteins					1	0	0	0	0	0	0	0	0	0	0	0	1	0	0	0	0	0	0	0
VCP	valosin containing protein (VCP)	VCP	7415	symbol	H. sapiens	7415	H. sapiens	VCP	valosin containing protein	GO:0042728 flavin-containing compound catabolic process;GO:0072389 flavin adenine dinucleotide catabolic process;GO:1903007 positive regulation of Lys63-specific deubiquitinase activity		Human disease related genes:Nervous system diseases:Neurodegenerative diseases; Predicted intracellular proteins; ENZYME proteins:Hydrolases; Disease related genes; Transporters:Primary Active Transporters; Potential drug targets; Human disease related genes:Musculoskeletal diseases:Muscular diseases; Enzymes	Cytosol;Nucleoplasm (Enhanced)	Phosphoaminophosphonic Acid-Adenylate Ester; Phenethyl Isothiocyanate			1	1	1	0	0	0	1	1	1	0	1	1	0	1	0	0	0	0	0	0
MAPKAP1	mitogen-activated protein kinase associated protein 1 (MAPKAP1)	MAPKAP1	79109	symbol	H. sapiens	79109	H. sapiens	MAPKAP1	MAPK associated protein 1	GO:0038203 TORC2 signaling;GO:0031929 TOR signaling;GO:0021762 substantia nigra development		Predicted intracellular proteins	Nucleoplasm (Supported); Additional: Cytosol		(M249)PID PI3KCI AKT PATHWAY; (M222)PID CXCR3 PATHWAY; (M121)PID MTOR 4PATHWAY	(M5923)HALLMARK PI3K AKT MTOR SIGNALING	0	0	0	0	1	0	1	0	0	1	0	1	0	0	1	1	0	1	0	0
PSEN1	presenilin 1 (PSEN1)	PSEN1	5663	symbol	H. sapiens	5663	H. sapiens	PSEN1	presenilin 1	GO:0021870 Cajal-Retzius cell differentiation;GO:1904797 negative regulation of core promoter binding;GO:0051563 smooth endoplasmic reticulum calcium ion homeostasis		Human disease related genes:Nervous system diseases:Neurodegenerative diseases; Human disease related genes:Skin diseases:Skin and soft tissue diseases; Predicted intracellular proteins; Peptidases:Aspartic-type peptidases; Human disease related genes:Cardiovascular diseases:Cardiac diseases; Disease related genes; Potential drug targets; Cancer-related genes:Mutational cancer driver genes; Enzym…	Golgi apparatus (Supported); Additional: Cell Junctions;Nucleoplasm		(M251)PID SYNDECAN 3 PATHWAY; (M70)PID PS1 PATHWAY; (M17)PID NOTCH PATHWAY	(M5902)HALLMARK APOPTOSIS; (M5921)HALLMARK COMPLEMENT; (M5932)HALLMARK INFLAMMATORY RESPONSE	0	1	0	0	0	0	1	0	1	0	1	1	1	1	1	1	1	1	0	1
OXSR1	oxidative stress responsive 1 (OXSR1)	OXSR1	9943	symbol	H. sapiens	9943	H. sapiens	OXSR1	oxidative stress responsive kinase 1	GO:0038116 chemokine (C-C motif) ligand 21 signaling pathway;GO:0007231 osmosensory signaling pathway;GO:0038146 chemokine (C-X-C motif) ligand 12 signaling pathway	STE Ser/Thr protein kinase family	ENZYME proteins:Transferases; Predicted intracellular proteins; Kinases:STE Ser/Thr protein kinases; Enzymes	Cytosol (Enhanced)	Fostamatinib		(M5938)HALLMARK REACTIVE OXYGEN SPECIES PATHWAY	0	1	0	0	0	0	0	0	1	1	0	1	0	0	0	0	0	0	0	0
TOR1A	torsin family 1 member A (TOR1A)	TOR1A	1861	symbol	H. sapiens	1861	H. sapiens	TOR1A	torsin family 1 member A	GO:1900244 positive regulation of synaptic vesicle endocytosis;GO:1903423 positive regulation of synaptic vesicle recycling;GO:0051584 regulation of dopamine uptake involved in synaptic transmission		Disease related genes; Predicted intracellular proteins; Human disease related genes:Nervous system diseases:Other nervous and sensory system diseases; Human disease related genes:Congenital malformations:Congenital malformations of the musculoskeletal system	Nuclear membrane;Vesicles (Supported)		(M275)PID ALPHA SYNUCLEIN PATHWAY		1	1	1	0	0	0	0	0	0	0	1	0	0	0	0	0	0	0	0	0
EIF4G1	eukaryotic translation initiation factor 4 gamma 1 (EIF4G1)	EIF4G1	1981	symbol	H. sapiens	1981	H. sapiens	EIF4G1	eukaryotic translation initiation factor 4 gamma 1	GO:1905535 regulation of eukaryotic translation initiation factor 4F complex assembly;GO:1905537 positive regulation of eukaryotic translation initiation factor 4F complex assembly;GO:1905610 regulation of mRNA cap binding		Disease related genes; Human disease related genes:Nervous system diseases:Neurodegenerative diseases; Predicted intracellular proteins; Cancer-related genes:Candidate cancer biomarkers	Cytosol (Enhanced)		(M66)PID MYC ACTIV PATHWAY	(M5922)HALLMARK UNFOLDED PROTEIN RESPONSE	1	0	0	0	1	0	1	0	0	1	1	1	0	1	0	0	1	1	1	1
ATF6	activating transcription factor 6 (ATF6)	ATF6	22926	symbol	H. sapiens	22926	H. sapiens	ATF6	activating transcription factor 6	GO:1903893 positive regulation of ATF6-mediated unfolded protein response;GO:1903891 regulation of ATF6-mediated unfolded protein response;GO:0036500 ATF6-mediated unfolded protein response		Disease related genes; Transcription factors:Basic domains; Predicted intracellular proteins; Human disease related genes:Nervous system diseases:Eye disease			(M229)PID P38 ALPHA BETA DOWNSTREAM PATHWAY	(M5922)HALLMARK UNFOLDED PROTEIN RESPONSE	1	0	1	1	1	1	1	1	0	0	0	1	0	1	0	0	0	0	0	1
STAU1	staufen double-stranded RNA binding protein 1 (STAU1)	STAU1	6780	symbol	H. sapiens	6780	H. sapiens	STAU1	staufen double-stranded RNA binding protein 1	GO:0046726 positive regulation by virus of viral protein levels in host cell;GO:0046719 regulation by virus of viral protein levels in host cell;GO:0099010 modification of postsynaptic structure		Predicted intracellular proteins	Cytosol (Enhanced)			(M5893)HALLMARK MITOTIC SPINDLE	0	1	0	0	0	0	0	0	0	0	0	0	0	0	0	0	0	0	0	0
MBTPS2	membrane bound transcription factor peptidase, site 2 (MBTPS2)	MBTPS2	51360	symbol	H. sapiens	51360	H. sapiens	MBTPS2	membrane bound transcription factor peptidase, site 2	GO:0036500 ATF6-mediated unfolded protein response;GO:1990440 positive regulation of transcription from RNA polymerase II promoter in response to endoplasmic reticulum stress;GO:0031293 membrane protein intracellular domain proteolysis		Human disease related genes:Congenital malformations:Congenital malformations of skin; Human disease related genes:Congenital malformations:Congenital malformations of the musculoskeletal system; ENZYME proteins:Hydrolases; Disease related genes; Potential drug targets; Peptidases:Metallopeptidases; Enzymes	Cytosol;Mitochondria;Nucleoplasm (Approved)				1	0	0	1	1	1	1	1	0	0	0	0	0	0	0	0	0	0	0	0
ATP2A2	ATPase sarcoplasmic/endoplasmic reticulum Ca2+ transporting 2 (ATP2A2)	ATP2A2	488	symbol	H. sapiens	488	H. sapiens	ATP2A2	ATPase sarcoplasmic/endoplasmic reticulum Ca2+ transporting 2	GO:1903515 calcium ion transport from cytosol to endoplasmic reticulum;GO:0032470 positive regulation of endoplasmic reticulum calcium ion concentration;GO:1990036 calcium ion import into sarcoplasmic reticulum		Human disease related genes:Congenital malformations:Congenital malformations of skin; Predicted intracellular proteins; Disease related genes; ENZYME proteins; Transporters:Primary Active Transporters; Enzymes; FDA approved drug targets:Small molecule drugs		Istaroxime		(M5924)HALLMARK MTORC1 SIGNALING; (M5932)HALLMARK INFLAMMATORY RESPONSE; (M5934)HALLMARK XENOBIOTIC METABOLISM	1	1	0	1	0	0	1	0	1	0	1	1	1	0	1	0	1	0	0	0
UBE3A	ubiquitin protein ligase E3A (UBE3A)	UBE3A	7337	symbol	H. sapiens	7337	H. sapiens	UBE3A	ubiquitin protein ligase E3A	GO:0035037 sperm entry;GO:1905528 positive regulation of Golgi lumen acidification;GO:1905526 regulation of Golgi lumen acidification		Predicted intracellular proteins; ENZYME proteins:Transferases; Disease related genes; Human disease related genes:Other congenital disorders:Chromosomal abnormalities; Potential drug targets; Enzymes	Nucleoplasm (Approved); Additional: Cytosol		(M58)PID AR PATHWAY; (M105)PID TELOMERASE PATHWAY		0	1	1	0	0	0	1	0	1	0	1	1	1	1	1	0	1	0	0	1
TMTC3	transmembrane and tetratricopeptide repeat containing 3 (TMTC3)	TMTC3	160418	symbol	H. sapiens	160418	H. sapiens	TMTC3	transmembrane O-mannosyltransferase targeting cadherins 3	GO:0035269 protein O-linked mannosylation;GO:0035268 protein mannosylation;GO:0097502 mannosylation		Human disease related genes:Congenital malformations:Congenital malformations of the nervous system; ENZYME proteins:Transferases; Disease related genes; Potential drug targets; Enzymes; Transporters:Accessory Factors Involved in Transport					1	0	0	0	0	0	1	0	0	0	0	0	0	0	0	0	0	0	0	0
EIF2AK4	eukaryotic translation initiation factor 2 alpha kinase 4 (EIF2AK4)	EIF2AK4	440275	symbol	H. sapiens	440275	H. sapiens	EIF2AK4	eukaryotic translation initiation factor 2 alpha kinase 4	GO:0036492 eiF2alpha phosphorylation in response to endoplasmic reticulum stress;GO:0071262 regulation of translational initiation in response to starvation;GO:0071264 positive regulation of translational initiation in response to starvation	Other	Predicted intracellular proteins; ENZYME proteins:Transferases; Kinases; Disease related genes; Human disease related genes:Cardiovascular diseases:Vascular diseases; Potential drug targets; Human disease related genes:Cardiovascular diseases:Hypertensive diseases; Enzymes	Cytosol (Approved)	Fostamatinib			1	0	0	0	0	0	1	1	0	1	0	0	0	0	0	0	1	1	1	1
CCDC47	coiled-coil domain containing 47 (CCDC47)	CCDC47	57003	symbol	H. sapiens	57003	H. sapiens	CCDC47	coiled-coil domain containing 47	GO:0006983 ER overload response;GO:0045048 protein insertion into ER membrane;GO:0032469 endoplasmic reticulum calcium ion homeostasis		Disease related genes; Predicted intracellular proteins; Transporters:Accessory Factors Involved in Transport; Potential drug targets	Endoplasmic reticulum (Enhanced)				1	0	1	1	0	0	0	0	0	0	0	0	1	0	0	0	0	0	0	0
PDCD10	programmed cell death 10 (PDCD10)	PDCD10	11235	symbol	H. sapiens	11235	H. sapiens	PDCD10	programmed cell death 10	GO:0010421 hydrogen peroxide-mediated programmed cell death;GO:0036481 intrinsic apoptotic signaling pathway in response to hydrogen peroxide;GO:0097468 programmed cell death in response to reactive oxygen species		Disease related genes; Predicted intracellular proteins; Human disease related genes:Congenital malformations:Congenital malformations of the nervous system			(M66)PID MYC ACTIV PATHWAY		0	1	0	0	1	0	0	0	0	0	1	1	0	0	0	0	0	1	0	1
TRA2B	transformer 2 beta homolog (Drosophila) (TRA2B)	TRA2B	6434	symbol	H. sapiens	6434	H. sapiens	TRA2B	transformer 2 beta homolog	GO:0021796 cerebral cortex regionalization;GO:0021978 telencephalon regionalization;GO:1990403 embryonic brain development		Predicted intracellular proteins	Nucleoplasm (Enhanced); Additional: Cytosol			(M5901)HALLMARK G2M CHECKPOINT; (M5925)HALLMARK E2F TARGETS; (M5926)HALLMARK MYC TARGETS V1	0	0	0	0	0	0	0	0	0	0	0	0	1	0	0	0	0	0	0	1
UBE2K	ubiquitin conjugating enzyme E2 K (UBE2K)	UBE2K	3093	symbol	H. sapiens	3093	H. sapiens	UBE2K	ubiquitin conjugating enzyme E2 K	GO:0010994 free ubiquitin chain polymerization;GO:0010992 ubiquitin recycling;GO:1903265 positive regulation of tumor necrosis factor-mediated signaling pathway		ENZYME proteins:Transferases; Predicted intracellular proteins; Enzymes	Cytosol (Approved); Additional: Plasma membrane				1	0	1	0	0	0	1	0	0	0	0	1	1	0	0	0	0	1	0	0
SP1	Sp1 transcription factor (SP1)	SP1	6667	symbol	H. sapiens	6667	H. sapiens	SP1	Sp1 transcription factor	GO:1904828 positive regulation of hydrogen sulfide biosynthetic process;GO:1904826 regulation of hydrogen sulfide biosynthetic process;GO:0051176 positive regulation of sulfur metabolic process		Transcription factors:Zinc-coordinating DNA-binding domains; Predicted intracellular proteins; Cancer-related genes:Candidate cancer biomarkers	Nucleoplasm (Enhanced)		(M234)PID IL2 STAT5 PATHWAY; (M44)PID HIF2PATHWAY; (M65)PID FRA PATHWAY	(M5939)HALLMARK P53 PATHWAY	0	1	0	0	0	1	0	1	0	0	0	1	0	0	1	0	1	0	1	0
UBQLN1	ubiquilin 1 (UBQLN1)	UBQLN1	29979	symbol	H. sapiens	29979	H. sapiens	UBQLN1	ubiquilin 1	GO:1901340 negative regulation of store-operated calcium channel activity;GO:0034140 negative regulation of toll-like receptor 3 signaling pathway;GO:0035973 aggrephagy		Predicted intracellular proteins	Nucleoplasm (Supported); Additional: Cytosol		(M124)PID CXCR4 PATHWAY	(M5905)HALLMARK ADIPOGENESIS	1	0	1	0	1	1	1	0	1	0	0	0	0	0	1	1	0	0	0	0
STT3B	STT3B, catalytic subunit of the oligosaccharyltransferase complex (STT3B)	STT3B	201595	symbol	H. sapiens	201595	H. sapiens	STT3B	STT3 oligosaccharyltransferase complex catalytic subunit B	GO:0043686 co-translational protein modification;GO:0018279 protein N-linked glycosylation via asparagine;GO:0018196 peptidyl-asparagine modification		Transporters; ENZYME proteins:Transferases; Disease related genes; Human disease related genes:Congenital disorders of metabolism:Congenital disorders of glycan/glycoprotein metabolism; Potential drug targets; Enzymes	Endoplasmic reticulum (Supported)				1	0	1	0	0	0	0	0	0	0	0	0	0	0	0	0	0	0	0	0
PARP1	poly(ADP-ribose) polymerase 1 (PARP1)	PARP1	142	symbol	H. sapiens	142	H. sapiens	PARP1	poly(ADP-ribose) polymerase 1	GO:0018424 peptidyl-glutamic acid poly-ADP-ribosylation;GO:1903518 positive regulation of single strand break repair;GO:1904762 positive regulation of myofibroblast differentiation		Enzymes; ENZYME proteins:Transferases; Cancer-related genes:Candidate cancer biomarkers; Predicted intracellular proteins; FDA approved drug targets:Small molecule drugs	Nucleoplasm (Enhanced); Additional: Nucleoli	Theophylline; Zinc; Carba-nicotinamide-adenine-dinucleotide; NU1025; Nicotinamide; 2-{3-[4-(4-Fluorophenyl)-3,6-Dihydro-1(2h)-Pyridinyl]Propyl}-8-Methyl-4(3h)-Quinazolinone; 3-Methoxybenzamide; 2-(4-Chlorophenyl)-5-Quinoxalinecarboxamide; 3,4-Dihydro-5-Methyl-Isoquinolinone; 2-(3'-Methoxyphenyl) Benzimidazole-4-Carboxamide; 6-AMINO-BENZO[DE]ISOQUINOLINE-1,3-DIONE; Veliparib; A-620223; 5-FLUORO-1-…	(M7997)SA CASPASE CASCADE; (M71)PID ILK PATHWAY; (M288)PID HES HEY PATHWAY		0	1	0	0	1	0	1	0	0	1	1	1	0	1	1	1	1	0	0	1
HDAC2	histone deacetylase 2 (HDAC2)	HDAC2	3066	symbol	H. sapiens	3066	H. sapiens	HDAC2	histone deacetylase 2	GO:1902435 regulation of male mating behavior;GO:1902437 positive regulation of male mating behavior;GO:0061198 fungiform papilla formation		ENZYME proteins:Hydrolases; Enzymes; Cancer-related genes:Candidate cancer biomarkers; Predicted intracellular proteins; FDA approved drug targets:Small molecule drugs	Nucleoplasm (Supported)	Pravastatin; Lovastatin; Theophylline; Valproic acid; Simvastatin; Atorvastatin; Fluvastatin; Aminophylline; Oxtriphylline; Vorinostat; Pracinostat; Romidepsin; Tixocortol; Mocetinostat	(M219)PID HEDGEHOG GLI PATHWAY; (M101)PID HDAC CLASSI PATHWAY; (M105)PID TELOMERASE PATHWAY	(M5895)HALLMARK WNT BETA CATENIN SIGNALING; (M5926)HALLMARK MYC TARGETS V1	0	1	0	0	0	0	1	0	0	0	1	1	0	1	1	0	0	1	0	1
ADNP2	ADNP homeobox 2 (ADNP2)	ADNP2	22850	symbol	H. sapiens	22850	H. sapiens	ADNP2	ADNP homeobox 2	GO:0071300 cellular response to retinoic acid;GO:0032526 response to retinoic acid;GO:0030307 positive regulation of cell growth		Transcription factors:Zinc-coordinating DNA-binding domains; Transcription factors:Helix-turn-helix domains; Predicted intracellular proteins	Cytosol;Mitochondria (Approved)				0	1	0	0	0	0	0	0	0	0	0	0	0	0	1	0	0	0	0	0
TMCO1	transmembrane and coiled-coil domains 1 (TMCO1)	TMCO1	54499	symbol	H. sapiens	54499	H. sapiens	TMCO1	transmembrane and coiled-coil domains 1	GO:0006983 ER overload response;GO:0032469 endoplasmic reticulum calcium ion homeostasis;GO:0006984 ER-nucleus signaling pathway		Disease related genes; Human disease related genes:Congenital malformations:Congenital malformations of the musculoskeletal system; Transporters:Transporter channels and pores; Potential drug targets	Endoplasmic reticulum (Supported)				1	0	0	1	0	0	0	0	0	0	0	0	1	0	0	0	0	0	0	0
NONO	non-POU domain containing, octamer-binding (NONO)	NONO	4841	symbol	H. sapiens	4841	H. sapiens	NONO	non-POU domain containing octamer binding	GO:1903377 negative regulation of oxidative stress-induced neuron intrinsic apoptotic signaling pathway;GO:1903376 regulation of oxidative stress-induced neuron intrinsic apoptotic signaling pathway;GO:1902176 negative regulation of oxidative stress-induced intrinsic apoptotic signaling pathway		Disease related genes; Cancer-related genes:Mutational cancer driver genes; Transcription factors:Yet undefined DNA-binding domains; Predicted intracellular proteins; Human disease related genes:Other diseases:Mental and behavioural disorders	Nucleoplasm (Enhanced); Additional: Nuclear speckles;Nucleoli fibrillar center		(M95)PID CIRCADIAN PATHWAY		0	0	0	0	1	0	1	0	0	0	1	0	0	1	1	1	0	0	0	0
UGGT1	UDP-glucose glycoprotein glucosyltransferase 1 (UGGT1)	UGGT1	56886	symbol	H. sapiens	56886	H. sapiens	UGGT1	UDP-glucose glycoprotein glucosyltransferase 1	GO:0097359 UDP-glucosylation;GO:0006011 UDP-glucose metabolic process;GO:0071712 ER-associated misfolded protein catabolic process		Predicted intracellular proteins	Cytosol (Uncertain)				1	0	1	0	0	0	0	0	0	0	0	1	0	0	0	0	0	0	0	0
SIN3A	SIN3 transcription regulator family member A (SIN3A)	SIN3A	25942	symbol	H. sapiens	25942	H. sapiens	SIN3A	SIN3 transcription regulator family member A	GO:0051595 response to methylglyoxal;GO:1901675 negative regulation of histone H3-K27 acetylation;GO:1901674 regulation of histone H3-K27 acetylation		Disease related genes; Cancer-related genes:Mutational cancer driver genes; Predicted intracellular proteins; Human disease related genes:Other congenital disorders:Chromosomal abnormalities	Nucleoplasm (Enhanced)		(M219)PID HEDGEHOG GLI PATHWAY; (M101)PID HDAC CLASSI PATHWAY; (M105)PID TELOMERASE PATHWAY		0	1	0	0	0	1	0	1	0	0	1	0	1	1	1	0	0	0	1	0
SSR1	signal sequence receptor subunit 1 (SSR1)	SSR1	6745	symbol	H. sapiens	6745	H. sapiens	SSR1	signal sequence receptor subunit 1	GO:0006613 cotranslational protein targeting to membrane;GO:0006612 protein targeting to membrane;GO:0090150 establishment of protein localization to membrane			Endoplasmic reticulum (Supported)			(M5922)HALLMARK UNFOLDED PROTEIN RESPONSE; (M5924)HALLMARK MTORC1 SIGNALING	1	0	0	0	0	0	0	1	0	0	0	0	0	0	0	0	0	0	0	0
ECT2	epithelial cell transforming 2 (ECT2)	ECT2	1894	symbol	H. sapiens	1894	H. sapiens	ECT2	epithelial cell transforming 2	GO:2000431 regulation of cytokinesis, actomyosin contractile ring assembly;GO:0032954 regulation of cytokinetic process;GO:0051988 regulation of attachment of spindle microtubules to kinetochore		Predicted intracellular proteins	Nucleoplasm (Enhanced); Additional: Cytosol		(M68)PID RHOA REG PATHWAY; (M129)PID PLK1 PATHWAY	(M5893)HALLMARK MITOTIC SPINDLE	0	1	0	1	0	0	0	0	0	1	1	0	0	1	0	0	0	1	1	0
FAF2	Fas associated factor family member 2 (FAF2)	FAF2	23197	symbol	H. sapiens	23197	H. sapiens	FAF2	Fas associated factor family member 2	GO:0030970 retrograde protein transport, ER to cytosol;GO:1903513 endoplasmic reticulum to cytosol transport;GO:0032527 protein exit from endoplasmic reticulum		Predicted intracellular proteins	Lipid droplets (Enhanced); Additional: Endoplasmic reticulum				1	0	1	0	0	0	0	0	0	0	0	0	0	0	0	0	0	0	0	0
USP14	ubiquitin specific peptidase 14 (USP14)	USP14	9097	symbol	H. sapiens	9097	H. sapiens	USP14	ubiquitin specific peptidase 14	GO:1903070 negative regulation of ER-associated ubiquitin-dependent protein catabolic process;GO:1904293 negative regulation of ERAD pathway;GO:1903069 regulation of ER-associated ubiquitin-dependent protein catabolic process		Peptidases:Cysteine-type peptidases; Predicted intracellular proteins; Enzymes; ENZYME proteins:Hydrolases	Cytosol;Plasma membrane (Supported)	Phenethyl Isothiocyanate		(M5921)HALLMARK COMPLEMENT	0	0	1	0	1	1	1	0	0	0	0	1	0	0	0	0	0	0	0	0
TMX1	thioredoxin related transmembrane protein 1 (TMX1)	TMX1	81542	symbol	H. sapiens	81542	H. sapiens	TMX1	thioredoxin related transmembrane protein 1	GO:0034976 response to endoplasmic reticulum stress;GO:0033554 cellular response to stress;GO:0006950 response to stress		Transporters:Accessory Factors Involved in Transport	Endoplasmic reticulum (Supported); Additional: Nucleoli			(M5910)HALLMARK PROTEIN SECRETION	1	0	0	0	0	0	0	0	0	0	0	0	0	0	0	0	0	0	0	0
OPA1	OPA1, mitochondrial dynamin like GTPase (OPA1)	OPA1	4976	symbol	H. sapiens	4976	H. sapiens	OPA1	OPA1 mitochondrial dynamin like GTPase	GO:0097749 membrane tubulation;GO:0000266 mitochondrial fission;GO:0008053 mitochondrial fusion		Predicted intracellular proteins; ENZYME proteins:Hydrolases; Human disease related genes:Nervous system diseases:Eye disease; Disease related genes; Potential drug targets; Enzymes; Transporters:Transporter channels and pores; Human disease related genes:Congenital disorders of metabolism:Mitochondrial diseases	Mitochondria;Nucleoplasm (Supported)			(M5936)HALLMARK OXIDATIVE PHOSPHORYLATION	0	0	0	0	1	1	1	0	0	0	1	0	0	0	0	1	0	0	0	0
ERCC8	ERCC excision repair 8, CSA ubiquitin ligase complex subunit( ERCC8)	ERCC8	1161	symbol	H. sapiens	1161	H. sapiens	ERCC8	ERCC excision repair 8, CSA ubiquitin ligase complex subunit	GO:0090262 regulation of transcription-coupled nucleotide-excision repair;GO:0097680 double-strand break repair via classical nonhomologous end joining;GO:0006283 transcription-coupled nucleotide-excision repair		Human disease related genes:Nervous system diseases:Neurodegenerative diseases; Human disease related genes:Congenital malformations:Other congenital malformations; Predicted intracellular proteins; Disease related genes; Human disease related genes:Skin diseases:Skin and soft tissue diseases	Nuclear speckles (Approved)			(M5898)HALLMARK DNA REPAIR	0	1	1	0	1	0	0	0	0	1	0	0	0	0	0	0	0	0	0	0
EIF2S1	eukaryotic translation initiation factor 2 subunit alpha (EIF2S1)	EIF2S1	1965	symbol	H. sapiens	1965	H. sapiens	EIF2S1	eukaryotic translation initiation factor 2 subunit alpha	GO:1990737 response to manganese-induced endoplasmic reticulum stress;GO:2000676 positive regulation of type B pancreatic cell apoptotic process;GO:0032057 negative regulation of translational initiation in response to stress		Predicted intracellular proteins	Cytosol (Enhanced)		(M66)PID MYC ACTIV PATHWAY	(M5922)HALLMARK UNFOLDED PROTEIN RESPONSE; (M5925)HALLMARK E2F TARGETS; (M5926)HALLMARK MYC TARGETS V1	1	1	0	1	0	1	0	1	0	1	1	1	0	1	0	0	1	0	0	0
GORASP2	golgi reassembly stacking protein 2 (GORASP2)	GORASP2	26003	symbol	H. sapiens	26003	H. sapiens	GORASP2	golgi reassembly stacking protein 2	GO:0061951 establishment of protein localization to plasma membrane;GO:0007030 Golgi organization;GO:0072659 protein localization to plasma membrane		Predicted intracellular proteins	Golgi apparatus (Enhanced)				1	0	0	0	0	0	0	0	0	0	0	0	0	0	0	0	0	0	0	0
HNRNPM	heterogeneous nuclear ribonucleoprotein M (HNRNPM)	HNRNPM	4670	symbol	H. sapiens	4670	H. sapiens	HNRNPM	heterogeneous nuclear ribonucleoprotein M	GO:2000815 regulation of mRNA stability involved in response to oxidative stress;GO:0010610 regulation of mRNA stability involved in response to stress;GO:0000380 alternative mRNA splicing, via spliceosome		Predicted intracellular proteins	Nucleoplasm (Enhanced)				0	1	0	0	0	0	0	0	0	0	0	0	0	0	1	0	0	0	0	0
SLC25A24	solute carrier family 25 member 24 (SLC25A24)	SLC25A24	29957	symbol	H. sapiens	29957	H. sapiens	SLC25A24	solute carrier family 25 member 24	GO:0015867 ATP transport;GO:0051503 adenine nucleotide transport;GO:0015868 purine ribonucleotide transport		Human disease related genes:Congenital malformations:Other congenital malformations; Transporters:Electrochemical Potential-driven transporters; Disease related genes; Potential drug targets; Predicted intracellular proteins	Mitochondria (Enhanced)				0	1	0	0	0	0	1	0	0	0	0	0	0	0	0	0	0	0	0	0
BFAR	bifunctional apoptosis regulator (BFAR)	BFAR	51283	symbol	H. sapiens	51283	H. sapiens	BFAR	bifunctional apoptosis regulator	GO:1903895 negative regulation of IRE1-mediated unfolded protein response;GO:1903894 regulation of IRE1-mediated unfolded protein response;GO:1900102 negative regulation of endoplasmic reticulum unfolded protein response		Predicted intracellular proteins					0	0	1	0	1	1	0	0	0	0	0	0	0	0	0	0	0	0	0	0
UBXN4	UBX domain protein 4 (UBXN4)	UBXN4	23190	symbol	H. sapiens	23190	H. sapiens	UBXN4	UBX domain protein 4	GO:0030433 ubiquitin-dependent ERAD pathway;GO:0036503 ERAD pathway;GO:0006986 response to unfolded protein		Predicted intracellular proteins	Endoplasmic reticulum (Supported)				1	0	1	0	0	0	0	0	1	0	0	0	0	0	0	0	0	0	0	0
TMED2	transmembrane p24 trafficking protein 2 (TMED2)	TMED2	10959	symbol	H. sapiens	10959	H. sapiens	TMED2	transmembrane p24 trafficking protein 2	GO:1905069 allantois development;GO:1903912 negative regulation of endoplasmic reticulum stress-induced eIF2 alpha phosphorylation;GO:0035964 COPI-coated vesicle budding		Predicted intracellular proteins; Transporters	Vesicles (Supported)			(M5910)HALLMARK PROTEIN SECRETION; (M5898)HALLMARK DNA REPAIR	1	0	0	1	1	0	0	0	0	1	1	0	0	0	0	0	1	0	0	1
PRKRA	protein activator of interferon induced protein kinase EIF2AK2 (PRKRA)	PRKRA	8575	symbol	H. sapiens	8575	H. sapiens	PRKRA	protein activator of interferon induced protein kinase EIF2AK2	GO:0042473 outer ear morphogenesis;GO:0030422 production of siRNA involved in post-transcriptional gene silencing by RNA;GO:0070922 RISC complex assembly		Disease related genes; Human disease related genes:Nervous system diseases:Other nervous and sensory system diseases; Predicted intracellular proteins	Cytosol (Supported); Additional: Nucleoplasm		(M144)PID CERAMIDE PATHWAY		0	1	0	0	0	0	0	0	0	1	0	0	0	1	0	1	0	0	0	1
PNPT1	polyribonucleotide nucleotidyltransferase 1 (PNPT1)	PNPT1	87178	symbol	H. sapiens	87178	H. sapiens	PNPT1	polyribonucleotide nucleotidyltransferase 1	GO:0090616 mitochondrial mRNA 3'-end processing;GO:0097222 mitochondrial mRNA polyadenylation;GO:0090615 mitochondrial mRNA processing		Predicted intracellular proteins; ENZYME proteins:Transferases; Disease related genes; Potential drug targets; Enzymes; Human disease related genes:Congenital disorders of metabolism:Mitochondrial diseases	Mitochondria (Supported); Additional: Cytosol			(M5911)HALLMARK INTERFERON ALPHA RESPONSE; (M5913)HALLMARK INTERFERON GAMMA RESPONSE	0	1	1	0	0	0	1	0	0	1	0	1	0	0	0	0	1	0	0	1
RHBDD1	rhomboid domain containing 1 (RHBDD1)	RHBDD1	84236	symbol	H. sapiens	84236	H. sapiens	RHBDD1	rhomboid domain containing 1	GO:1904211 membrane protein proteolysis involved in retrograde protein transport, ER to cytosol;GO:0031293 membrane protein intracellular domain proteolysis;GO:0030970 retrograde protein transport, ER to cytosol		Peptidases:Serine-type peptidases; Transporters; Enzymes; ENZYME proteins:Hydrolases; Predicted intracellular proteins	Endoplasmic reticulum (Supported)				1	0	1	0	0	0	1	0	0	1	0	0	0	0	0	0	0	0	0	0
ERLIN1	ER lipid raft associated 1 (ERLIN1)	ERLIN1	10613	symbol	H. sapiens	10613	H. sapiens	ERLIN1	ER lipid raft associated 1	GO:0045541 negative regulation of cholesterol biosynthetic process;GO:0090206 negative regulation of cholesterol metabolic process;GO:0106119 negative regulation of sterol biosynthetic process		Human disease related genes:Nervous system diseases:Other nervous and sensory system diseases; Disease related genes; Potential drug targets; Predicted intracellular proteins; Transporters:Transporter channels and pores	Endoplasmic reticulum (Supported)				1	0	1	1	0	0	1	0	0	0	0	0	0	0	0	0	0	0	0	0
CASP3	caspase 3 (CASP3)	CASP3	836	symbol	H. sapiens	836	H. sapiens	CASP3	caspase 3	GO:0008627 intrinsic apoptotic signaling pathway in response to osmotic stress;GO:0061713 anterior neural tube closure;GO:0034349 glial cell apoptotic process		Predicted intracellular proteins; ENZYME proteins:Hydrolases; Peptidases:Cysteine-type peptidases; Cancer-related genes:Candidate cancer biomarkers; Enzymes; FDA approved drug targets:Small molecule drugs	Mitochondria (Approved); Additional: Nucleoplasm	Pamidronic acid; Acetylsalicylic acid; Minocycline; 5-[4-(1-Carboxymethyl-2-Oxo-Propylcarbamoyl)-Benzylsulfamoyl]-2-Hydroxy-Benzoic Acid; Emricasan; Incadronic acid; 2-HYDROXY-5-(2-MERCAPTO-ETHYLSULFAMOYL)-BENZOIC ACID; methyl (3S)-3-[(tert-butoxycarbonyl)amino]-4-oxopentanoate; 1-METHYL-5-(2-PHENOXYMETHYL-PYRROLIDINE-1-SULFONYL)-1H-INDOLE-2,3-DIONE; [N-(3-dibenzylcarbamoyl-oxiranecarbonyl)-hydra…	(M5060)SA FAS SIGNALING; (M7997)SA CASPASE CASCADE; (M240)PID SYNDECAN 2 PATHWAY	(M5941)HALLMARK UV RESPONSE UP; (M5902)HALLMARK APOPTOSIS; (M5947)HALLMARK IL2 STAT5 SIGNALING	1	1	0	0	0	0	1	0	0	1	1	1	0	1	1	0	1	0	0	1

## Sheet: Antioxidant gene set
Gene ID	Category	Search List (Metascape re-annotation)	Gene ID	Type	Tax ID	Homologene Gene ID	Homologene Gene Tax ID	Gene Symbol	Description	Biological Process (GO)	Protein Function (Protein Atlas)	Subcellular Location (Protein Atlas)	Drug (DrugBank)	Canonical Pathways_x000D_	Hallmark Gene Sets_x000D_	GO:0098869 cellular oxidant detoxificatio	WP3940 One-carbon metabolism and rela	WP408 Oxidative stress response	GO:0030091 protein repair	WP2884 NRF2 pathway	GO:0000305 response to oxygen radical	GO:0046514 ceramide catabolic process	GO:0042542 response to hydrogen peroxide	GO:0046686 response to cadmium ion	R-HSA-2142770 Synthesis of 15-eicosatetraeno	GO:0043154 negative regulation of cystein	GO:0044275 cellular carbohydrate cataboli	GO:0046822 regulation of nucleocytoplasmi	WP2447 Amyotrophic lateral sclerosis	GO:1903311 regulation of mRNA metabolic p	GO:1903313 positive regulation of mRNA me	GO:0006974 cellular response to DNA damag
CAT	Antioxidative Enzymes	CAT	847	symbol	H. sapiens	847	H. sapiens	CAT	catalase	GO:0061691 detoxification of hydrogen peroxide;GO:0061692 cellular detoxification of hydrogen peroxide;GO:0080184 response to phenylpropanoid	Predicted intracellular proteins; Disease related genes; ENZYME proteins:Oxidoreductases; Cancer-related genes:Candidate cancer biomarkers; Human disease related genes:Congenital disorders of metabolism:Peroxisomal diseases; Enzymes; FDA approved drug targets:Small molecule drugs	Vesicles (Enhanced)	Fomepizole; Cannabidiol; Medical Cannabis; Nabiximols	(M136)PID FOXO PATHWAY	(M5938)HALLMARK REACTIVE OXYGEN SPECIES PATHWAY; (M5949)HALLMARK PEROXISOME; (M5948)HALLMARK BILE ACID METABOLISM	1	1	1	0	0	0	1	1	1	0	1	0	0	1	0	0	0
GPX1	Antioxidative Enzymes	GPX1	2876	symbol	H. sapiens	2876	H. sapiens	GPX1	glutathione peroxidase 1	GO:0051450 myoblast proliferation;GO:0009608 response to symbiont;GO:0009609 response to symbiotic bacterium	Predicted intracellular proteins; Human disease related genes:Congenital disorders of metabolism:Congenital disorders of amino acid metabolism; ENZYME proteins:Oxidoreductases; Human disease related genes:Cardiovascular diseases:Hematologic diseases; Enzymes; Cancer-related genes:Candidate cancer biomarkers	Cytosol (Supported)	Glutathione; Cannabidiol; Medical Cannabis; Nabiximols	(M145)PID P53 DOWNSTREAM PATHWAY	(M5902)HALLMARK APOPTOSIS	1	1	1	0	0	1	1	1	1	1	1	0	0	1	0	0	0
GPX2	Antioxidative Enzymes	GPX2	2877	symbol	H. sapiens	2877	H. sapiens	GPX2	glutathione peroxidase 2	GO:0098869 cellular oxidant detoxification;GO:1990748 cellular detoxification;GO:0097237 cellular response to toxic substance	ENZYME proteins:Oxidoreductases; Predicted intracellular proteins; Enzymes; Cancer-related genes:Candidate cancer biomarkers	Nucleoplasm (Approved); Additional: Cytosol	Glutathione	(M236)PID DELTA NP63 PATHWAY; (M256)PID TAP63 PATHWAY	(M5939)HALLMARK P53 PATHWAY	1	1	1	0	1	0	1	0	1	1	0	0	0	0	0	0	0
GPX3	Antioxidative Enzymes	GPX3	2878	symbol	H. sapiens	2878	H. sapiens	GPX3	glutathione peroxidase 3	GO:0006982 response to lipid hydroperoxide;GO:0033194 response to hydroperoxide;GO:0042744 hydrogen peroxide catabolic process	Predicted secreted proteins; ENZYME proteins:Oxidoreductases; Predicted intracellular proteins; Enzymes		Glutathione		(M5938)HALLMARK REACTIVE OXYGEN SPECIES PATHWAY; (M5941)HALLMARK UV RESPONSE UP; (M5902)HALLMARK APOPTOSIS	1	1	1	0	1	0	0	0	0	0	0	0	0	0	0	0	0
GPX4	Antioxidative Enzymes	GPX4	2879	symbol	H. sapiens	2879	H. sapiens	GPX4	glutathione peroxidase 4	GO:0110075 regulation of ferroptosis;GO:0110076 negative regulation of ferroptosis;GO:0019372 lipoxygenase pathway	Predicted intracellular proteins; Human disease related genes:Congenital malformations:Congenital malformations of the musculoskeletal system; Disease related genes; ENZYME proteins:Oxidoreductases; Potential drug targets; Enzymes	Mitochondria;Nucleoplasm (Approved)	Glutathione		(M5938)HALLMARK REACTIVE OXYGEN SPECIES PATHWAY; (M5898)HALLMARK DNA REPAIR; (M5902)HALLMARK APOPTOSIS	1	1	1	1	0	0	1	1	0	1	0	0	0	1	0	0	0
GPX8	Antioxidative Enzymes	GPX8	493869	symbol	H. sapiens	493869	H. sapiens	GPX8	glutathione peroxidase 8 (putative)	GO:0098869 cellular oxidant detoxification;GO:1990748 cellular detoxification;GO:0097237 cellular response to toxic substance	ENZYME proteins:Oxidoreductases; Predicted intracellular proteins; Enzymes	Cytosol;Plasma membrane (Approved); Additional: Actin filaments			(M5892)HALLMARK CHOLESTEROL HOMEOSTASIS	1	1	1	0	0	0	0	0	0	0	0	0	0	0	0	0	0
PRDX1	Antioxidative Enzymes	PRDX1	5052	symbol	H. sapiens	5052	H. sapiens	PRDX1	peroxiredoxin 1	GO:0019430 removal of superoxide radicals;GO:0071450 cellular response to oxygen radical;GO:0071451 cellular response to superoxide	ENZYME proteins:Oxidoreductases; Predicted intracellular proteins; Human disease related genes:Congenital disorders of metabolism:Congenital disorders of cofactor/vitamin metabolism; Enzymes	Mitochondria (Approved)	Zinc; Copper; Artenimol; Zinc acetate; Zinc chloride; Zinc sulfate, unspecified form	(M58)PID AR PATHWAY	(M5938)HALLMARK REACTIVE OXYGEN SPECIES PATHWAY; (M5949)HALLMARK PEROXISOME; (M5924)HALLMARK MTORC1 SIGNALING	1	0	0	0	1	1	0	1	1	0	0	0	0	0	0	0	0
PRDX2	Antioxidative Enzymes	PRDX2	7001	symbol	H. sapiens	7001	H. sapiens	PRDX2	peroxiredoxin 2	GO:0002536 respiratory burst involved in inflammatory response;GO:0002679 respiratory burst involved in defense response;GO:0019430 removal of superoxide radicals	ENZYME proteins:Oxidoreductases; Predicted intracellular proteins; Enzymes; Cancer-related genes:Candidate cancer biomarkers		3-sulfino-L-alanine; N-Carbamoyl-Alanine; Copper		(M5938)HALLMARK REACTIVE OXYGEN SPECIES PATHWAY; (M5945)HALLMARK HEME METABOLISM	1	1	0	0	1	1	0	1	0	0	1	0	0	0	0	0	0
PRDX3	Antioxidative Enzymes	PRDX3	10935	symbol	H. sapiens	10935	H. sapiens	PRDX3	peroxiredoxin 3	GO:0018171 peptidyl-cysteine oxidation;GO:0018158 protein oxidation;GO:0042744 hydrogen peroxide catabolic process	ENZYME proteins:Oxidoreductases; Predicted intracellular proteins; Enzymes	Mitochondria (Supported)		(M66)PID MYC ACTIV PATHWAY	(M5905)HALLMARK ADIPOGENESIS; (M5926)HALLMARK MYC TARGETS V1; (M5936)HALLMARK OXIDATIVE PHOSPHORYLATION	1	1	0	0	0	0	0	1	0	0	1	0	0	0	0	0	0
PRDX4	Antioxidative Enzymes	PRDX4	10549	symbol	H. sapiens	10549	H. sapiens	PRDX4	peroxiredoxin 4	GO:1905937 negative regulation of germ cell proliferation;GO:2000255 negative regulation of male germ cell proliferation;GO:1905936 regulation of germ cell proliferation	ENZYME proteins:Oxidoreductases; Predicted intracellular proteins; Enzymes; Cancer-related genes:Candidate cancer biomarkers	Endoplasmic reticulum (Supported); Additional: Cytosol			(M5938)HALLMARK REACTIVE OXYGEN SPECIES PATHWAY; (M5925)HALLMARK E2F TARGETS; (M5926)HALLMARK MYC TARGETS V1	1	0	0	0	0	0	1	0	0	0	0	0	0	0	0	0	0
PRDX5	Antioxidative Enzymes	PRDX5	25824	symbol	H. sapiens	25824	H. sapiens	PRDX5	peroxiredoxin 5	GO:0016480 negative regulation of transcription by RNA polymerase III;GO:0042744 hydrogen peroxide catabolic process;GO:0006359 regulation of transcription by RNA polymerase III	ENZYME proteins:Oxidoreductases; Predicted intracellular proteins; Enzymes; FDA approved drug targets:Small molecule drugs	Mitochondria (Supported)	Auranofin; Diminazene		(M5949)HALLMARK PEROXISOME; (M5948)HALLMARK BILE ACID METABOLISM; (M5891)HALLMARK HYPOXIA	1	0	0	0	1	0	0	0	1	0	1	0	0	0	0	0	0
PRDX6	Antioxidative Enzymes	PRDX6	9588	symbol	H. sapiens	9588	H. sapiens	PRDX6	peroxiredoxin 6	GO:0048026 positive regulation of mRNA splicing, via spliceosome;GO:0046475 glycerophospholipid catabolic process;GO:0050685 positive regulation of mRNA processing	ENZYME proteins:Hydrolases; Enzymes; ENZYME proteins:Transferases; ENZYME proteins:Oxidoreductases; Predicted intracellular proteins	Cytosol;Plasma membrane (Supported)	2-(N-morpholino)ethanesulfonic acid; Copper		(M5938)HALLMARK REACTIVE OXYGEN SPECIES PATHWAY; (M5935)HALLMARK FATTY ACID METABOLISM	1	1	0	0	1	1	1	0	0	0	0	0	0	0	1	1	0
SOD1	Antioxidative Enzymes	SOD1	6647	symbol	H. sapiens	6647	H. sapiens	SOD1	superoxide dismutase 1	GO:0097332 response to antipsychotic drug;GO:0034465 response to carbon monoxide;GO:1902177 positive regulation of oxidative stress-induced intrinsic apoptotic signaling pathway	Human disease related genes:Nervous system diseases:Neurodegenerative diseases; Predicted intracellular proteins; Disease related genes; ENZYME proteins:Oxidoreductases; Potential drug targets; Enzymes; Cancer-related genes:Candidate cancer biomarkers	Cytosol;Nucleoplasm;Plasma membrane (Supported)	Dopamine; Isoprenaline; Zinc; 5-fluorouridine; S-oxy-L-cysteine; Arimoclomol; Cannabidiol; Medical Cannabis; Nabiximols; Zinc acetate; Zinc chloride; Zinc sulfate, unspecified form	(M285)PID HNF3A PATHWAY; (M200)PID ERA GENOMIC PATHWAY	(M5938)HALLMARK REACTIVE OXYGEN SPECIES PATHWAY; (M5910)HALLMARK PROTEIN SECRETION; (M5949)HALLMARK PEROXISOME	1	1	1	0	0	1	0	1	1	0	0	0	0	1	0	0	0
SOD2	Antioxidative Enzymes	SOD2	6648	symbol	H. sapiens	6648	H. sapiens	SOD2	superoxide dismutase 2	GO:0001315 age-dependent response to reactive oxygen species;GO:0003068 regulation of systemic arterial blood pressure by acetylcholine;GO:0003069 acetylcholine-mediated vasodilation involved in regulation of systemic arterial blood pressure	Predicted intracellular proteins; Disease related genes; ENZYME proteins:Oxidoreductases; Potential drug targets; Human disease related genes:Urinary system diseases:Kidney diseases; Enzymes; Cancer-related genes:Candidate cancer biomarkers	Mitochondria (Enhanced)	Benzylsulfonic acid; 3-Fluoro-L-tyrosine	(M136)PID FOXO PATHWAY	(M5938)HALLMARK REACTIVE OXYGEN SPECIES PATHWAY; (M5949)HALLMARK PEROXISOME; (M5941)HALLMARK UV RESPONSE UP	1	1	1	0	0	1	0	1	1	0	0	0	0	1	0	0	1
SOD3	Antioxidative Enzymes	SOD3	6649	symbol	H. sapiens	6649	H. sapiens	SOD3	superoxide dismutase 3	GO:0019430 removal of superoxide radicals;GO:0071450 cellular response to oxygen radical;GO:0071451 cellular response to superoxide	Predicted secreted proteins; ENZYME proteins:Oxidoreductases; Enzymes				(M5909)HALLMARK MYOGENESIS	1	1	1	0	1	1	0	1	1	0	0	0	0	0	0	0	0
SRXN1	Antioxidative Enzymes	SRXN1	140809	symbol	H. sapiens	140809	H. sapiens	SRXN1	sulfiredoxin 1	GO:0098869 cellular oxidant detoxification;GO:1990748 cellular detoxification;GO:0097237 cellular response to toxic substance	ENZYME proteins:Oxidoreductases; Predicted intracellular proteins; Enzymes				(M5938)HALLMARK REACTIVE OXYGEN SPECIES PATHWAY	1	1	0	0	1	0	0	0	0	0	0	0	0	0	0	0	0
ABHD10	Carbohydrate catabolic process	ABHD10	55347	symbol	H. sapiens	55347	H. sapiens	ABHD10	abhydrolase domain containing 10, depalmitoylase	GO:0019389 glucuronoside metabolic process;GO:0019391 glucuronoside catabolic process;GO:0016139 glycoside catabolic process	Predicted intracellular proteins; Enzymes; ENZYME proteins:Hydrolases	Mitochondria (Approved)				0	1	0	0	0	0	1	0	0	1	0	1	0	0	0	0	0
ADRB1	Carbohydrate catabolic process	ADRB1	153	symbol	H. sapiens	153	H. sapiens	ADRB1	adrenoceptor beta 1	GO:0001997 positive regulation of the force of heart contraction by epinephrine-norepinephrine;GO:0003099 positive regulation of the force of heart contraction by chemical signal;GO:0002025 norepinephrine-epinephrine-mediated vasodilation involved in regulation of systemic arterial blood pressure	Transporters; G-protein coupled receptors:GPCRs excl olfactory receptors; FDA approved drug targets:Small molecule drugs		Spermine; Amphetamine; Esmolol; Betaxolol; Bethanidine; Isoetharine; Ranolazine; Cabergoline; Metoprolol; Olanzapine; Atenolol; Norepinephrine; Timolol; Phenylpropanolamine; Loxapine; Sotalol; Carteolol; Nortriptyline; Lamotrigine; Propranolol; Labetalol; Bisoprolol; Epinephrine; Paroxetine; Trimipramine; Cryptenamine; Dobutamine; Pseudoephedrine; Alprenolol; Terbutaline; Salmeterol; Pindolol; Fo…			0	1	0	0	0	0	0	1	0	0	0	0	0	0	0	0	0
AOAH	Carbohydrate catabolic process	AOAH	313	symbol	H. sapiens	313	H. sapiens	AOAH	acyloxyacyl hydrolase	GO:0008653 lipopolysaccharide metabolic process;GO:0009104 lipopolysaccharide catabolic process;GO:0044247 cellular polysaccharide catabolic process	Predicted secreted proteins; Enzymes; ENZYME proteins:Hydrolases	Vesicles (Uncertain)				0	0	0	0	0	0	1	1	0	1	0	1	0	0	0	0	0
GUSB	Carbohydrate catabolic process	GUSB	2990	symbol	H. sapiens	2990	H. sapiens	GUSB	glucuronidase beta	GO:0019389 glucuronoside metabolic process;GO:0019391 glucuronoside catabolic process;GO:0016139 glycoside catabolic process	Predicted intracellular proteins; ENZYME proteins:Hydrolases; Human disease related genes:Congenital disorders of metabolism:Lysosomal storage diseases; Cancer-related genes:Mutated cancer genes; Disease related genes; Human disease related genes:Congenital disorders of metabolism:Congenital disorders of glycan/glycoprotein metabolism; Potential drug targets; Enzymes	Vesicles (Supported)			(M5892)HALLMARK CHOLESTEROL HOMEOSTASIS; (M5937)HALLMARK GLYCOLYSIS	0	1	0	0	0	0	1	0	0	0	0	1	0	0	0	0	0
SCARB2	Carbohydrate catabolic process	SCARB2	950	symbol	H. sapiens	950	H. sapiens	SCARB2	scavenger receptor class B member 2	GO:1904978 regulation of endosome organization;GO:1905123 regulation of glucosylceramidase activity;GO:1905671 regulation of lysosome organization	Disease related genes; Transporters; Human disease related genes:Nervous system diseases:Epilepsy; Potential drug targets	Cytosol (Approved)				0	0	0	0	0	0	1	1	0	0	0	0	1	0	0	0	0
DHX9	DNA Repair	DHX9	1660	symbol	H. sapiens	1660	H. sapiens	DHX9	DExH-box helicase 9	GO:0039695 DNA-templated viral transcription;GO:1905698 positive regulation of polysome binding;GO:1905696 regulation of polysome binding	Cancer-related genes:Mutational cancer driver genes; Predicted intracellular proteins; Enzymes; ENZYME proteins:Hydrolases	Nucleoplasm (Supported); Additional: Nucleoli				0	1	0	0	0	0	0	1	0	0	1	0	1	0	1	0	1
POLG2	DNA Repair	POLG2	11232	symbol	H. sapiens	11232	H. sapiens	POLG2	DNA polymerase gamma 2, accessory subunit	GO:0006264 mitochondrial DNA replication;GO:1900262 regulation of DNA-directed DNA polymerase activity;GO:1900264 positive regulation of DNA-directed DNA polymerase activity	Disease related genes; Human disease related genes:Nervous system diseases:Eye disease; Predicted intracellular proteins; Human disease related genes:Congenital disorders of metabolism:Mitochondrial diseases	Mitochondria (Supported); Additional: Nuclear bodies			(M5941)HALLMARK UV RESPONSE UP	0	1	0	0	0	0	0	0	1	0	0	0	0	0	0	0	1
POLR2G	DNA Repair	POLR2G	5436	symbol	H. sapiens	5436	H. sapiens	POLR2G	RNA polymerase II subunit G	GO:0060213 positive regulation of nuclear-transcribed mRNA poly(A) tail shortening;GO:0060211 regulation of nuclear-transcribed mRNA poly(A) tail shortening;GO:0000291 nuclear-transcribed mRNA catabolic process, exonucleolytic	RNA polymerase related proteins; Predicted intracellular proteins	Nucleoplasm (Supported)			(M5898)HALLMARK DNA REPAIR	0	0	1	0	1	0	0	0	0	0	0	0	0	0	1	1	0
ZRANB3	DNA Repair	ZRANB3	84083	symbol	H. sapiens	84083	H. sapiens	ZRANB3	zinc finger RANBP2-type containing 3	GO:0036292 DNA rewinding;GO:0048478 replication fork protection;GO:2000104 negative regulation of DNA-templated DNA replication	Predicted intracellular proteins; Cancer-related genes:Mutated cancer genes	Nucleoplasm (Supported)				0	0	0	0	0	0	0	0	0	0	0	0	0	1	0	0	1
GCLC	GSH Synthesis or Reduction	GCLC	2729	symbol	H. sapiens	2729	H. sapiens	GCLC	glutamate-cysteine ligase catalytic subunit	GO:0097069 cellular response to thyroxine stimulus;GO:1904387 cellular response to L-phenylalanine derivative;GO:2000490 negative regulation of hepatic stellate cell activation	Predicted intracellular proteins; Human disease related genes:Congenital disorders of metabolism:Congenital disorders of amino acid metabolism; Disease related genes; ENZYME proteins:Ligase; Human disease related genes:Cardiovascular diseases:Hematologic diseases; Enzymes; Potential drug targets	Nucleoplasm (Approved); Additional: Cytosol;Nucleoli	Glutamic acid; Cysteine		(M5938)HALLMARK REACTIVE OXYGEN SPECIES PATHWAY; (M5924)HALLMARK MTORC1 SIGNALING; (M5934)HALLMARK XENOBIOTIC METABOLISM	1	1	1	0	1	0	1	1	1	0	1	0	0	0	0	1	0
GCLM	GSH Synthesis or Reduction	GCLM	2730	symbol	H. sapiens	2730	H. sapiens	GCLM	glutamate-cysteine ligase modifier subunit	GO:0035227 regulation of glutamate-cysteine ligase activity;GO:0035229 positive regulation of glutamate-cysteine ligase activity;GO:0097069 cellular response to thyroxine stimulus	Predicted intracellular proteins; Cancer-related genes:Candidate cancer biomarkers	Cytosol;Nucleoplasm (Approved); Additional: Plasma membrane	Glutamic acid; Cysteine		(M5938)HALLMARK REACTIVE OXYGEN SPECIES PATHWAY; (M5948)HALLMARK BILE ACID METABOLISM; (M5945)HALLMARK HEME METABOLISM	1	1	0	0	1	0	1	0	0	0	0	0	0	0	0	0	0
GSR	GSH Synthesis or Reduction	GSR	2936	symbol	H. sapiens	2936	H. sapiens	GSR	glutathione-disulfide reductase	GO:0045454 cell redox homeostasis;GO:0006749 glutathione metabolic process;GO:0098869 cellular oxidant detoxification	Predicted intracellular proteins; Disease related genes; ENZYME proteins:Oxidoreductases; Cancer-related genes:Candidate cancer biomarkers; Enzymes; FDA approved drug targets:Small molecule drugs	Cytosol (Supported)	Glutathione; NADH; Carmustine; 3,6-dihydroxy-xanthene-9-propionic acid; 3-sulfino-L-alanine; Glutathionylspermidine disulfide; 3-(Prop-2-Ene-1-Sulfinyl)-Propene-1-Thiol; Flavin adenine dinucleotide; Glutathione disulfide; 3-nitro-L-tyrosine; 2-(2-PHENYL-3-PYRIDIN-2-YL-4,5,6,7-TETRAHYDRO-2H-ISOPHOSPHINDOL-1-YL)PYRIDINE; 6-(3-METHYL-1,4-DIOXO-1,4-DIHYDRONAPHTHALEN-2-YL)HEXANOIC ACID; Cannabidiol; C…		(M5938)HALLMARK REACTIVE OXYGEN SPECIES PATHWAY; (M5908)HALLMARK ANDROGEN RESPONSE; (M5902)HALLMARK APOPTOSIS	1	1	1	0	1	0	0	0	1	0	0	0	0	0	0	0	0
GSS	GSH Synthesis or Reduction	GSS	2937	symbol	H. sapiens	2937	H. sapiens	GSS	glutathione synthetase	GO:0006750 glutathione biosynthetic process;GO:0019184 nonribosomal peptide biosynthetic process;GO:0042398 cellular modified amino acid biosynthetic process	Predicted intracellular proteins; Human disease related genes:Congenital disorders of metabolism:Congenital disorders of amino acid metabolism; Disease related genes; ENZYME proteins:Ligase; Human disease related genes:Cardiovascular diseases:Hematologic diseases; Enzymes; FDA approved drug targets:Small molecule drugs	Nucleoplasm (Supported)	Glutathione; Glycine; Cysteine; gamma-Glutamylcysteine; Phosphoaminophosphonic Acid-Adenylate Ester; Acetylcysteine; Copper		(M5934)HALLMARK XENOBIOTIC METABOLISM	1	1	0	0	0	0	1	0	1	0	0	0	0	0	0	0	0
ASAH2	Lipid Membrane Degradation	ASAH2	56624	symbol	H. sapiens	56624	H. sapiens	ASAH2	N-acylsphingosine amidohydrolase 2	GO:0044241 lipid digestion;GO:0046512 sphingosine biosynthetic process;GO:0046520 sphingoid biosynthetic process	Predicted intracellular proteins; Enzymes; ENZYME proteins:Hydrolases	Focal adhesion sites (Approved)				0	1	0	0	0	0	1	0	0	1	0	0	0	0	0	0	0
GM2A	Lipid Membrane Degradation	GM2A	2760	symbol	H. sapiens	2760	H. sapiens	GM2A	GM2 ganglioside activator	GO:0006689 ganglioside catabolic process;GO:0009313 oligosaccharide catabolic process;GO:0046479 glycosphingolipid catabolic process	Disease related genes; Human disease related genes:Congenital disorders of metabolism:Congenital disorders of lipid/glycolipid metabolism; Human disease related genes:Congenital disorders of metabolism:Lysosomal storage diseases; Predicted intracellular proteins	Cytosol;Vesicles (Approved)	Platelet Activating Factor; Lauric acid; Lpc-Ether; Choline alfoscerate; Myristic acid		(M5939)HALLMARK P53 PATHWAY	0	1	0	0	0	0	1	1	0	0	0	0	0	0	0	0	0
HEXA	Lipid Membrane Degradation	HEXA	3073	symbol	H. sapiens	3073	H. sapiens	HEXA	hexosaminidase subunit alpha	GO:0006689 ganglioside catabolic process;GO:0046479 glycosphingolipid catabolic process;GO:0019377 glycolipid catabolic process	Predicted intracellular proteins; ENZYME proteins:Hydrolases; Human disease related genes:Congenital disorders of metabolism:Lysosomal storage diseases; Candidate cardiovascular disease genes; Disease related genes; Potential drug targets; Human disease related genes:Congenital disorders of metabolism:Congenital disorders of lipid/glycolipid metabolism; Enzymes	Vesicles (Supported); Additional: Cytosol			(M5891)HALLMARK HYPOXIA	0	1	0	0	0	0	1	0	0	0	0	0	0	0	0	0	0
HEXB	Lipid Membrane Degradation	HEXB	3074	symbol	H. sapiens	3074	H. sapiens	HEXB	hexosaminidase subunit beta	GO:0008049 male courtship behavior;GO:0007619 courtship behavior;GO:0060179 male mating behavior	Predicted intracellular proteins; ENZYME proteins:Hydrolases; Human disease related genes:Congenital disorders of metabolism:Lysosomal storage diseases; Disease related genes; Potential drug targets; Human disease related genes:Congenital disorders of metabolism:Congenital disorders of lipid/glycolipid metabolism; Enzymes		Pyrimethamine; 2-Acetamido-2-Deoxy-D-Glucono-1,5-Lactone; N-Acetyl-glucosamine thiazoline; (2R,3R,4S,5R)-2-acetamido-3,4-dihydroxy-5-hydroxymethyl-piperidine			1	1	0	0	0	0	1	1	0	0	0	0	0	0	0	0	0
NEU4	Lipid Membrane Degradation	NEU4	129807	symbol	H. sapiens	129807	H. sapiens	NEU4	neuraminidase 4	GO:0006689 ganglioside catabolic process;GO:0009313 oligosaccharide catabolic process;GO:0046479 glycosphingolipid catabolic process	Predicted intracellular proteins; Enzymes; ENZYME proteins:Hydrolases					0	1	0	0	0	0	1	0	0	0	0	0	0	0	0	0	0
FN3K	Protein Repair	FN3K	64122	symbol	H. sapiens	64122	H. sapiens	FN3K	fructosamine 3 kinase	GO:0030393 fructoselysine metabolic process;GO:0030389 fructosamine metabolic process;GO:0036525 protein deglycation	ENZYME proteins:Transferases; Predicted intracellular proteins; Enzymes	Mitochondria (Approved)			(M5945)HALLMARK HEME METABOLISM	0	1	0	1	0	0	0	0	0	0	0	0	0	0	0	0	0
MSRA	Protein Repair	MSRA	4482	symbol	H. sapiens	4482	H. sapiens	MSRA	methionine sulfoxide reductase A	GO:0030091 protein repair;GO:0006555 methionine metabolic process;GO:0000096 sulfur amino acid metabolic process	ENZYME proteins:Oxidoreductases; Predicted intracellular proteins; Enzymes	Cytosol;Nucleoplasm (Supported); Additional: Actin filaments;Plasma membrane	1,4-Dithiothreitol		(M5938)HALLMARK REACTIVE OXYGEN SPECIES PATHWAY	1	1	0	1	0	0	0	0	0	0	0	0	0	0	0	0	0
MSRB1	Protein Repair	MSRB1	51734	symbol	H. sapiens	51734	H. sapiens	MSRB1	methionine sulfoxide reductase B1	GO:0030091 protein repair;GO:0030041 actin filament polymerization;GO:0008154 actin polymerization or depolymerization	ENZYME proteins:Oxidoreductases; Predicted intracellular proteins; Enzymes	Nucleoplasm (Enhanced)			(M5921)HALLMARK COMPLEMENT	1	0	0	1	0	0	0	0	0	0	0	0	0	0	0	0	0
MSRB2	Protein Repair	MSRB2	22921	symbol	H. sapiens	22921	H. sapiens	MSRB2	methionine sulfoxide reductase B2	GO:0030091 protein repair;GO:0030041 actin filament polymerization;GO:0008154 actin polymerization or depolymerization	ENZYME proteins:Oxidoreductases; Predicted intracellular proteins; Enzymes				(M5946)HALLMARK COAGULATION	1	0	0	1	0	0	0	0	0	0	0	0	0	0	0	0	0
MSRB3	Protein Repair	MSRB3	253827	symbol	H. sapiens	253827	H. sapiens	MSRB3	methionine sulfoxide reductase B3	GO:0030091 protein repair;GO:0006979 response to oxidative stress;GO:0044267 cellular protein metabolic process	Predicted intracellular proteins; Human disease related genes:Nervous system diseases:Ear disease; Disease related genes; ENZYME proteins:Oxidoreductases; Potential drug targets; Enzymes					1	0	0	1	0	0	0	0	0	0	0	0	0	0	0	0	0
PARK7	Protein Repair	PARK7	11315	symbol	H. sapiens	11315	H. sapiens	PARK7	Parkinsonism associated deglycase	GO:0036471 cellular response to glyoxal;GO:0036526 peptidyl-cysteine deglycation;GO:0036527 peptidyl-arginine deglycation	Human disease related genes:Nervous system diseases:Neurodegenerative diseases; Predicted intracellular proteins; ENZYME proteins:Hydrolases; Peptidases:Cysteine-type peptidases; Disease related genes; Potential drug targets; Enzymes	Cytosol;Nucleoplasm (Supported)	Copper	(M275)PID ALPHA SYNUCLEIN PATHWAY		1	1	1	1	0	0	1	1	1	1	1	0	1	0	0	1	1
PCMT1	Protein Repair	PCMT1	5110	symbol	H. sapiens	5110	H. sapiens	PCMT1	protein-L-isoaspartate (D-aspartate) O-methyltransferase	GO:0030091 protein repair;GO:0006479 protein methylation;GO:0008213 protein alkylation	ENZYME proteins:Transferases; Predicted intracellular proteins; Enzymes	Cytosol (Supported)	S-adenosyl-L-homocysteine			0	0	0	1	0	0	0	0	0	0	0	0	0	0	0	0	0
AGO1	RNA Catabolic Process	AGO1	26523	symbol	H. sapiens	26523	H. sapiens	AGO1	argonaute RISC component 1	GO:0010501 RNA secondary structure unwinding;GO:0070922 RISC complex assembly;GO:0031054 pre-miRNA processing	Predicted intracellular proteins	Cytoplasmic bodies (Supported); Additional: Cytosol				1	0	0	0	1	0	0	0	0	0	0	0	0	0	1	0	0
EIF4ENIF1	RNA Catabolic Process	EIF4ENIF1	56478	symbol	H. sapiens	56478	H. sapiens	EIF4ENIF1	eukaryotic translation initiation factor 4E nuclear import factor 1	GO:0106288 regulation of deadenylation-dependent decapping of nuclear-transcribed mRNA;GO:0106289 negative regulation of deadenylation-dependent decapping of nuclear-transcribed mRNA;GO:0060213 positive regulation of nuclear-transcribed mRNA poly(A) tail shortening	Predicted intracellular proteins	Vesicles (Enhanced)				0	0	0	0	0	0	0	0	0	0	0	0	1	0	1	1	0
LSM2	RNA Catabolic Process	LSM2	57819	symbol	H. sapiens	57819	H. sapiens	LSM2	LSM2 homolog, U6 small nuclear RNA and mRNA degradation associated	GO:0000244 spliceosomal tri-snRNP complex assembly;GO:0000387 spliceosomal snRNP assembly;GO:0006402 mRNA catabolic process	Predicted intracellular proteins	Nucleoplasm (Enhanced)			(M5926)HALLMARK MYC TARGETS V1	0	0	0	0	0	0	0	0	0	0	0	0	0	0	1	0	0
NPM1	RNA Catabolic Process	NPM1	4869	symbol	H. sapiens	4869	H. sapiens	NPM1	nucleophosmin 1	GO:0060735 regulation of eIF2 alpha phosphorylation by dsRNA;GO:1902629 regulation of mRNA stability involved in cellular response to UV;GO:0006407 rRNA export from nucleus	Cancer-related genes:Mutated cancer genes; Disease related genes; Human disease related genes:Cancers:Cancers of haematopoietic and lymphoid tissues; Cancer-related genes:Mutational cancer driver genes; Predicted intracellular proteins	Nucleoli rim (Enhanced); Additional: Nucleoplasm	Artenimol	(M258)PID BARD1 PATHWAY; (M14)PID AURORA B PATHWAY; (M255)PID HIF1 TFPATHWAY	(M5928)HALLMARK MYC TARGETS V2; (M5922)HALLMARK UNFOLDED PROTEIN RESPONSE; (M5926)HALLMARK MYC TARGETS V1	0	1	0	0	1	0	0	1	0	0	1	0	0	1	1	0	1
NRDE2	RNA Catabolic Process	NRDE2	55051	symbol	H. sapiens	55051	H. sapiens	NRDE2	NRDE-2, necessary for RNA interference, domain containing	GO:0046833 positive regulation of RNA export from nucleus;GO:0032241 positive regulation of nucleobase-containing compound transport;GO:0046831 regulation of RNA export from nucleus	Predicted intracellular proteins	Mitochondria;Nucleoplasm (Supported)				0	0	0	0	0	0	0	0	0	0	0	0	1	0	1	0	1
TXN	TXN Synthesis or Reduction	TXN	7295	symbol	H. sapiens	7295	H. sapiens	TXN	thioredoxin	GO:2000170 positive regulation of peptidyl-cysteine S-nitrosylation;GO:0046826 negative regulation of protein export from nucleus;GO:2000169 regulation of peptidyl-cysteine S-nitrosylation	Predicted intracellular proteins	Cytosol;Nucleoplasm (Enhanced)	Phenethyl Isothiocyanate	(M20)PID P38 MKK3 6PATHWAY; (M128)PID TNF PATHWAY; (M50)PID PTP1B PATHWAY	(M5938)HALLMARK REACTIVE OXYGEN SPECIES PATHWAY; (M5937)HALLMARK GLYCOLYSIS	1	0	0	1	1	1	1	1	1	0	0	0	1	1	0	0	0
TXNRD1	TXN Synthesis or Reduction	TXNRD1	7296	symbol	H. sapiens	7296	H. sapiens	TXNRD1	thioredoxin reductase 1	GO:0045454 cell redox homeostasis;GO:0001707 mesoderm formation;GO:0048332 mesoderm morphogenesis	Enzymes; ENZYME proteins:Oxidoreductases; Cancer-related genes:Candidate cancer biomarkers; Predicted intracellular proteins; FDA approved drug targets:Small molecule drugs	Nucleoplasm (Supported)	Arsenic trioxide; NADPH; Flavin adenine dinucleotide; Spermidine; Fotemustine; Motexafin gadolinium; PX-12		(M5938)HALLMARK REACTIVE OXYGEN SPECIES PATHWAY; (M5924)HALLMARK MTORC1 SIGNALING	1	1	1	0	1	1	1	0	0	0	0	0	0	0	0	0	0
TXNRD2	TXN Synthesis or Reduction	TXNRD2	10587	symbol	H. sapiens	10587	H. sapiens	TXNRD2	thioredoxin reductase 2	GO:0010269 response to selenium ion;GO:0000305 response to oxygen radical;GO:0055093 response to hyperoxia	Predicted intracellular proteins; Human disease related genes:Endocrine and metabolic diseases:Adrenal gland diseases; Disease related genes; ENZYME proteins:Oxidoreductases; Potential drug targets; Enzymes	Cytosol;Mitochondria (Approved)	Motexafin gadolinium		(M5938)HALLMARK REACTIVE OXYGEN SPECIES PATHWAY	1	1	1	0	0	1	0	0	1	0	0	0	0	0	0	0	0
